# Supplementary material for: Multimodal Therapy Approaches for NUT Carcinoma by Dual Combination of Oncolytic Virus Talimogene Laherparepvec with Small Molecule Inhibitors
Source: MDPI journal article supplement (doi:10.3390/v16050775), 2024-05-14
Supplement: s1 [file s1]

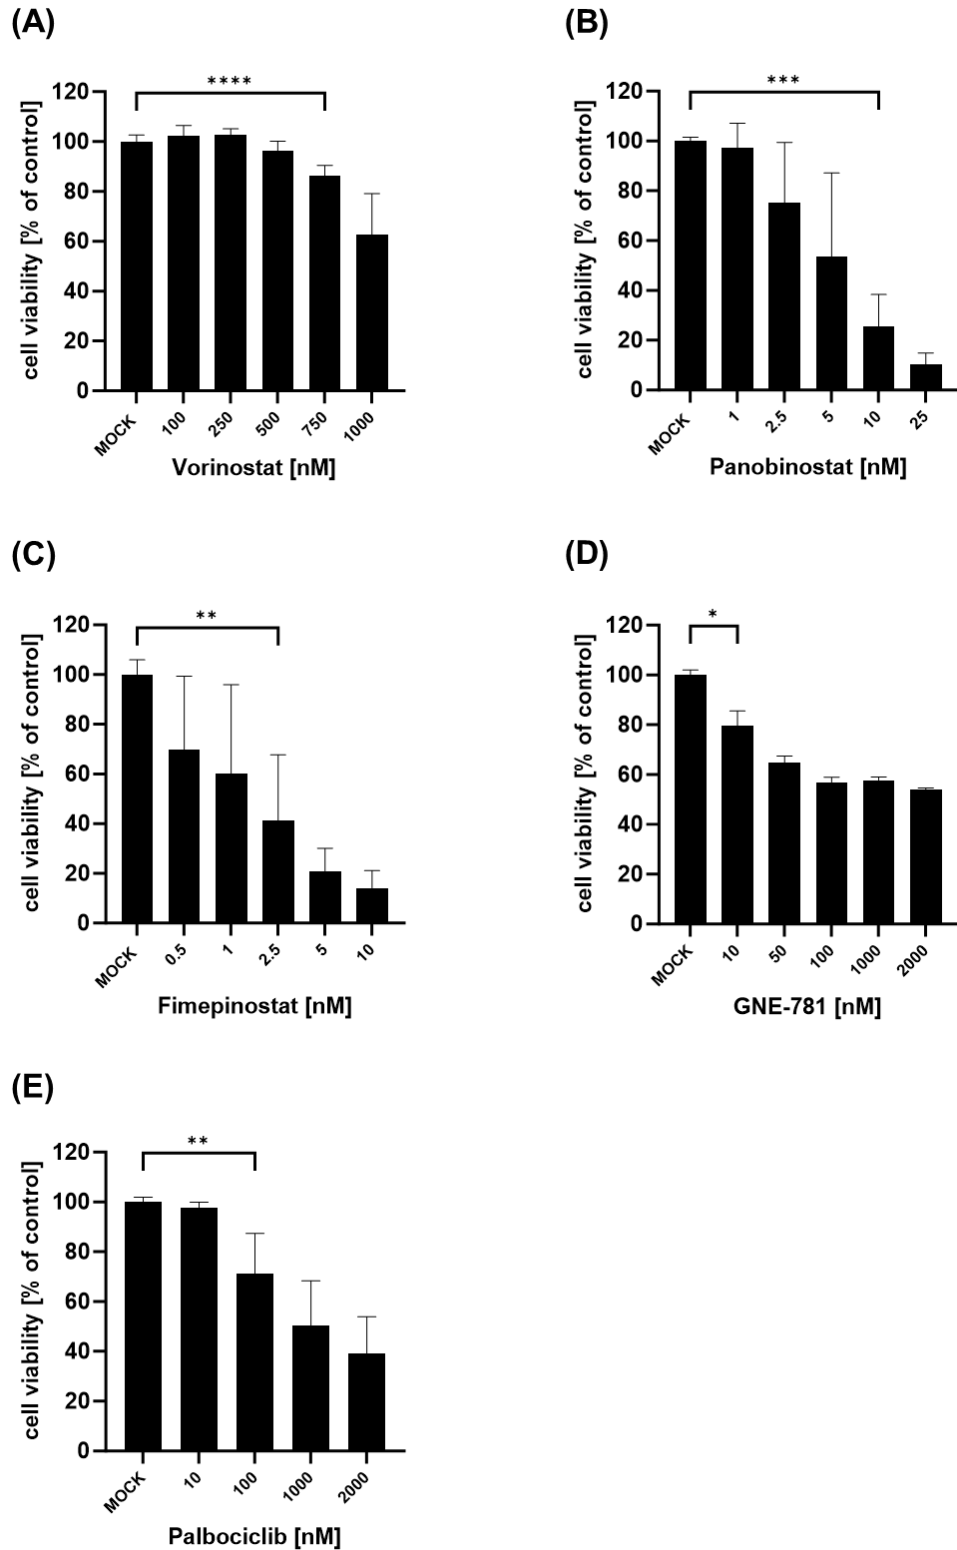

**Figure S2.** Viability of human NC cell line 143100 after monotherapeutic treatment with five small molecule inhibitors (SMIs): Tumor cells were mono-treated with vorinostat (A), panobinostat (B), fimepinostat (C), GNE-781 (D), palbociclib (E) at ascending concentrations or remained untreated (MOCK). The remaining NC tumor cells were determined at 96 h after treatment by SRB viability assays. The anti-tumor effects mediated by distinct SMI are calculated relative to MOCK controls. The mean  $\pm$  SD of at least two independent experiments performed in triplicates is shown, except for GNE-781 with one performed experiment. Displayed significance levels refer to the lowest concentration that caused a significant result, compared to MOCK. \*  $p < 0.05$ , \*\*  $p < 0.01$ , \*\*\*  $p < 0.001$ , \*\*\*\*  $p < 0.0001$ .
