# Supplementary material for: Multimodal Therapy Approaches for NUT Carcinoma by Dual Combination of Oncolytic Virus Talimogene Laherparepvec with Small Molecule Inhibitors
Source: MDPI journal article supplement (doi:10.3390/v16050775), 2024-05-14
Supplement: s1 [file s1]

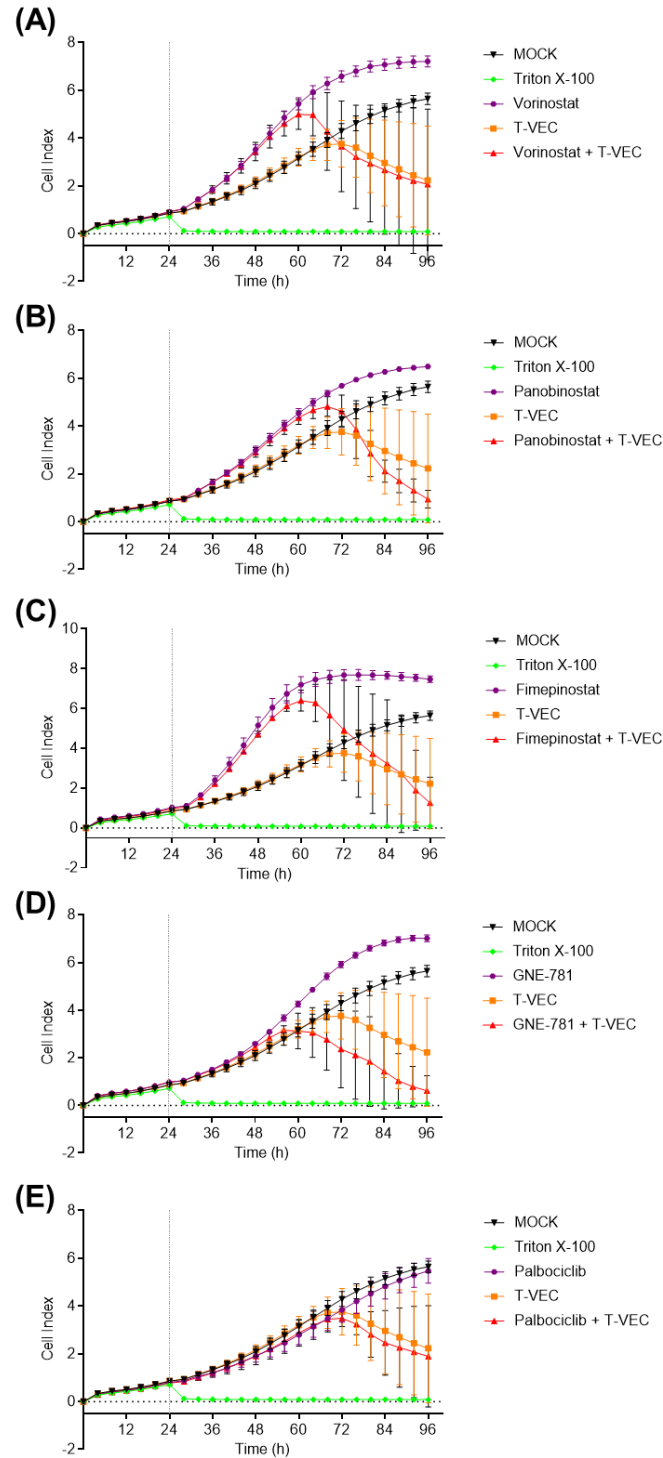

**Figure S12.** Real-time analysis of 14169 NC tumor cells under treatment with T-VEC alone or under dual combination therapies with the small molecule inhibitors (SMIs). 14169 tumor cells were treated 24 h after seeding with T-VEC (MOI 0.00005) or with the SMI at the indicated concentration alone (vorinostat (500 nM) (A), panobinostat (2.5 nM) (B), fimepinostat (1 nM) (C), GNE-781 (25 nM) (D), palbociclib (2  $\mu$ M) (E)) or in combination. Triton X-100 0.1 % was added as negative control, resulting in maximal tumor cell lysis. Real-time cell proliferation was monitored using the xCELLigence® RTCA SP system 1.2.1. Cell index on y-axis is defined by measured electrode impedance. Vertical dashed lines mark the point of infection. MOCK, Triton X-100 and T-VEC curves are the same in each graph. Mean  $\pm$  SD of one representative experiment at least performed in quadruplicates is shown.
