# Supplementary material for: Multimodal Therapy Approaches for NUT Carcinoma by Dual Combination of Oncolytic Virus Talimogene Laherparepvec with Small Molecule Inhibitors
Source: MDPI journal article supplement (doi:10.3390/v16050775), 2024-05-14
Supplement: s1 [file s1]

**(A) 690100**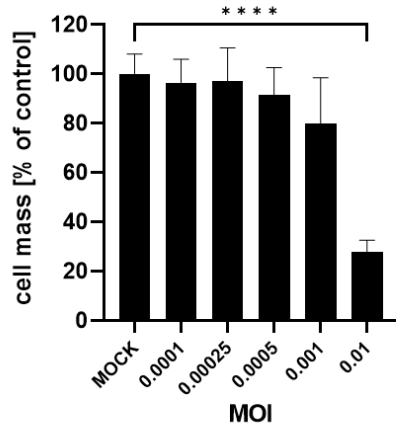**(B) 143100**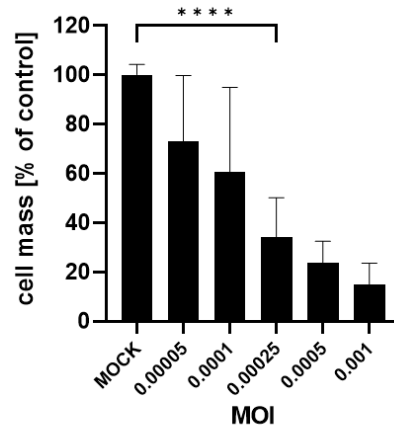**(C) HCC2429**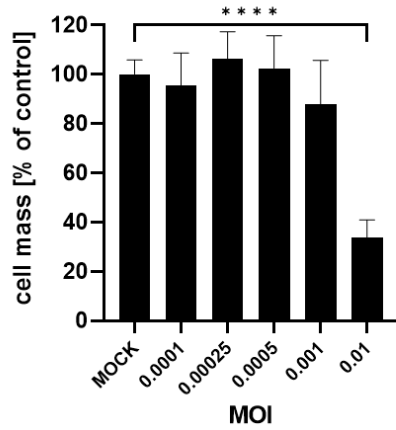**(D) 10-15**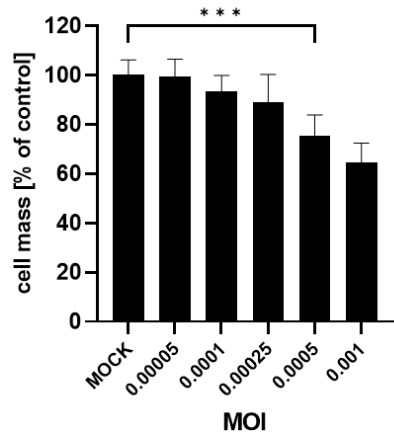**(E) 14169**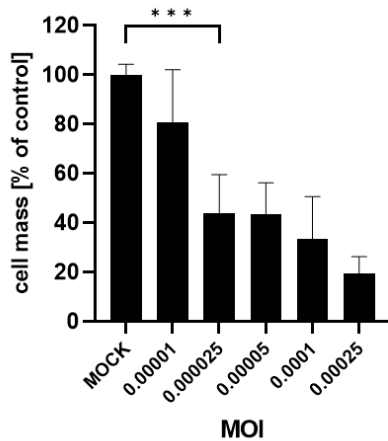

**Figure S6.** Viability of human NC cell lines after monotherapeutic treatment with T-VEC: NC tumor cells 690100 (A), 143100 (B), HCC2429 (C), 10-15 (D), 14169 (E) were infected with T-VEC at different multiplicities of infection (MOI) or remained uninfected (MOCK). Remaining NC tumor cells were determined at 72 h post-infection (hpi) by SRB viability assay. T-VEC-mediated oncolysis was calculated relatively to MOCK control. The mean  $\pm$  SD of at least two independent experiments performed in quadruplicates is shown. Displayed significance levels refer to the lowest MOIs that caused a significant result, compared to MOCK. \*\*\*  $p < 0.001$ , \*\*\*\*  $p < 0.0001$ .
