# Supplementary material for: Multimodal Therapy Approaches for NUT Carcinoma by Dual Combination of Oncolytic Virus Talimogene Laherparepvec with Small Molecule Inhibitors
Source: MDPI journal article supplement (doi:10.3390/v16050775), 2024-05-14
Supplement: s1 [file s1]

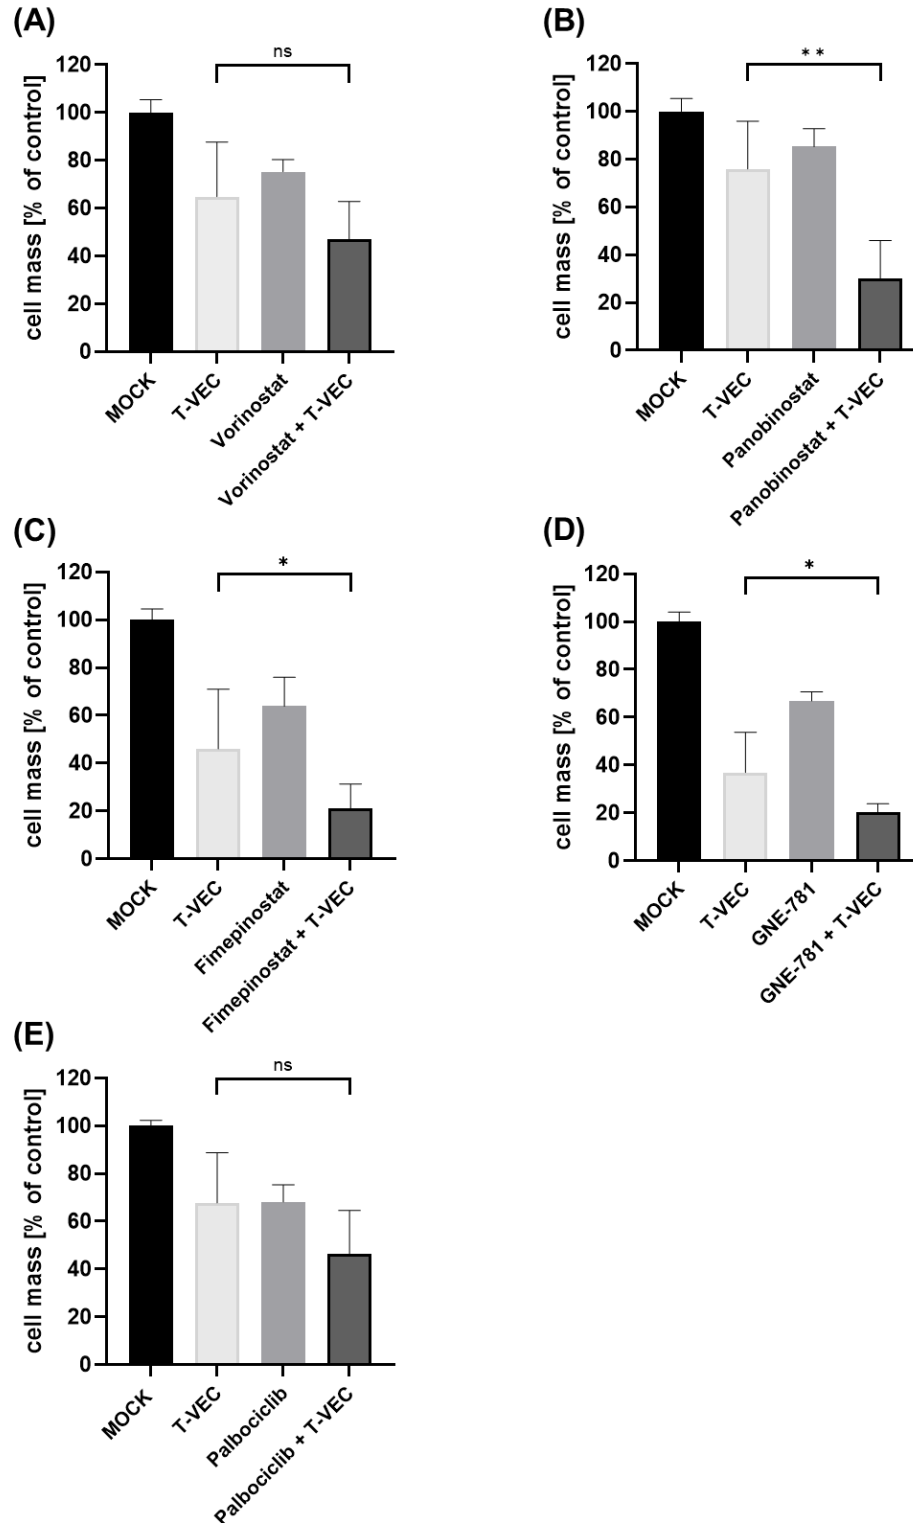

**Figure S8.** Viability of human NC cell line 14169 after dual combination treatment with T-VEC and small molecule inhibitors (SMIs): 14169 cells were infected with T-VEC at a multiplicity of infection (MOI) of 0.00005 and treated with the SMIs vorinostat (500 nM) (A), panobinostat (2.5 nM) (B), fimepinostat (1 nM) (C), GNE-781 (25 nM) (D), palbociclib (2  $\mu$ M) (E) in dual combination or alone, or remained untreated (MOCK). The remaining NC tumor cells were determined at 72 h post-infection (hpi) by SRB viability assays. The mean  $\pm$  SD of at least two independent experiments performed in quadruplicates is shown. Reported significances refer to dual combination compared to the respective monotherapy with the lowest remaining cell viability. \*  $p < 0.05$ ; \*\*  $p < 0.01$ , n.s. not significant.
