# Supplementary material for: Multimodal Therapy Approaches for NUT Carcinoma by Dual Combination of Oncolytic Virus Talimogene Laherparepvec with Small Molecule Inhibitors
Source: Viruses. 2024 May 14;16(5):775. doi: 10.3390/v16050775 (PMC11125747; doi:10.3390/v16050775)
Supplement: Supplementary file 1 [file viruses-16-00775-s001.zip]

Archive with 15 entries (15 files):
- FigureS1.pdf
- FigureS10.pdf
- FigureS11.pdf
- FigureS12.pdf
- FigureS13.pdf
- FigureS14.pdf
- FigureS15.pdf
- FigureS2.pdf
- FigureS3.pdf
- FigureS4.pdf
- FigureS5.pdf
- FigureS6.pdf
- FigureS7.pdf
- FigureS8.pdf
- FigureS9.pdf
